# Supplementary material for: From ambivalence to agency: parents’ conceptions of a theory-based behavioural intervention to prevent dental caries in their preschool children – a qualitative study
Source: Research Square preprint supplement (doi:10.21203/rs.3.rs-8221127/v1), 2025-12-08
Supplement: Supplementary file 1 [file 7794dcbfa88a447ea768df28.docx]

**Interview guide**

**Purpose**
The aim of this study is to describe the different ways in which parents perceive a theory-based behavioural intervention to prevent dental caries in their preschool-aged children.

**Participant information given and signed informed consent collected**
 **Introduction**

We are here today to talk about how you experienced the health conversations with health promoters in the Public Dental Service.

**1. Starting from the beginning**

**How did it come about that you were offered meetings with a health promoter?**

- What did you feel at that time?
- What were your thoughts then?
- What thoughts or feelings did you have before the visits?
- Had you participated in similar conversations before?

**2. What happened during the meeting with the health promoter?**

- What did you feel then?
- What were your thoughts at the time?
- How do you usually feel when visiting dental care?
- How would you describe the atmosphere during the meeting?
- Did you feel understood, respected, and listened to?
- Were the expectations placed on you reasonable?

**3. Have the meetings with the health promoter affected you in any way?**

- Could you describe this in more detail?
- How do you think or feel about that?

**4. What could have improved your meeting with the health promoter?**

- What support or type of contact with dental care would you wish for?
- What are your thoughts about that?
- How do you think that would feel?

**5. Finally**

**Is there anything else you would like to add?**
